# Supplementary material for: Impact of coronary collaterals on in-hospital and 5-year mortality after ST-elevation myocardial infarction in the contemporary percutaneous coronary intervention era: a prospective observational study
Source: PubMed Central journal article supplement — BMJ Open. 2016 Jul 13;6(7):e011105. doi: 10.1136/bmjopen-2016-011105 (PMC4947770; doi:10.1136/bmjopen-2016-011105), 2016-07-13
Supplement: bmjopen-2016-011105supp_table.pdf [file bmjopen-2016-011105supp_table.pdf]

Supplementary Table 1. Number of missing data

| Parameter               | Overall<br>(n=3,340) |
|-------------------------|----------------------|
| Age                     | 0                    |
| Male                    | 0                    |
| Onset to admission      | 0                    |
| Coronary risk factor    |                      |
| Diabetes                | 101                  |
| Hypertension            | 117                  |
| Dyslipidemia            | 163                  |
| Smoking                 | 50                   |
| Previous MI             | 76                   |
| Angina Pectoris         | 135                  |
| KILLIP classification   | 124                  |
| Laboratory data         |                      |
| Peak CPK                | 65                   |
| CAG Findings            |                      |
| Culprit vessel          | 19                   |
| Multivessel disease     | 25                   |
| Emergency PCI           |                      |
| Final TIMI 3            | 151                  |
| CABG                    | 63                   |
| Medication at discharge |                      |
| ACEI                    | 0                    |
| ARB                     | 0                    |
| Beta-blocker            | 0                    |
| Ca-blocker              | 0                    |
| Statin                  | 0                    |
| Diuretics               | 0                    |

ACEI, angiotensin-converting enzyme inhibitor; ARB, angiotensin receptor blocker; CAG, coronary angiography; CABG, coronary artery bypass graft; CPK, creatine phosphokinase; PCI, percutaneous coronary intervention; and TIMI, Thrombolysis In Myocardial Infarction
